# Supplementary material for: Multifunctional BiF3:Ln3+ (Ln = Ho, Er, Tm)/Yb3+ nanoparticles: an investigation on the emission color tuning, thermosensitivity, and bioimaging
Source: Royal Society of Chemistry journal article supplement (doi:10.1039/c9ra01018a), 2019-01-01
Supplement: c9ra01018a1.pdf [file c9ra01018a1.pdf]

**Multifunctional BiF<sub>3</sub>:Ln<sup>3+</sup>(Ln = Ho, Er, Tm)/Yb<sup>3+</sup> nanoparticles:  
investigation on the emission colour tuning, thermosensitivity and bio  
imaging**

Xinxin Yan<sup>a</sup>, Tiesheng Li<sup>a\*</sup>, Linna Guo<sup>a</sup>, Honglei Li<sup>a</sup>, Penglei Chen<sup>b</sup>, Minghua Liu<sup>b\*</sup>

<sup>a</sup>*College of Chemistry and Molecular Engineering, Zhengzhou University, The Key Lab of Chemical Biology and Organic Chemistry of Henan Province, The Key Lab of Nano-information Materials of Zhengzhou, Zhengzhou, 450001, P. R. China.*

<sup>b</sup>*Beijing National Laboratory for Molecular Science, Institute of Chemistry, Chinese Academy of Sciences, Beijing, 100190, P. R. China.*

\*Corresponding author. Tiesheng Li,

E-mail address: lts34@zzu.edu.cn

Tel.: +86-371-67766667 (Office)

Fax.: +86-371-67766667 (Office)

## 1. Experimental

### 1.1 Materials

Analytical grade bismuth nitrate pentahydrate ( $\text{Bi}(\text{NO}_3)_3 \cdot 5\text{H}_2\text{O}$  AR grade), ammonium fluoride ( $\text{NH}_4\text{F}$ , 98%), Yttrium oxide ( $\text{Yb}_2\text{O}_3$ , 99.99%), Erbium oxide ( $\text{Er}_2\text{O}_3$ , 99.99%), Thulium oxide ( $\text{Tm}_2\text{O}_3$ , 99.99%), Holmium oxide ( $\text{Ho}_2\text{O}_3$ , 99.99%), and Ethylene glycol (EG) were purchased from Aladdin Chemical Reagent Factory (China). The corresponding rare earth oxides are dissolved in dilute  $\text{HNO}_3$  under stirring and then the solvent is evaporated to obtain all the rare earth nitrates.

### 1.2 Preparation of cubic $\text{BiF}_3:\text{Ln}^{3+}$ ( $\text{Ln} = \text{Ho}, \text{Er}, \text{Tm}$ )/ $\text{Yb}^{3+}$ UCNPs

0.78 mmol  $\text{Bi}(\text{NO}_3)_3 \cdot 5\text{H}_2\text{O}$ , 0.02 mmol  $\text{Er}(\text{NO}_3)_3$  and 0.20 mmol  $\text{Yb}(\text{NO}_3)_3$  were added to 10 mL EG in a beaker under vigorously stirring. Then 25 ml EG with 5 mmol  $\text{NH}_4\text{F}$  was added into the above solution and stirred for 1 min. Subsequently, the resulting suspension was separated and washed with deionized water and ethanol several times by centrifugation, after that dried at room temperature. In addition, 20% $\text{Yb}^{3+}$ , 2% $\text{Ho}^{3+}$ /0.5% $\text{Tm}^{3+}$  co-doped  $\text{BiF}_3$  UCNPs were obtained by the same method. The similar procedure was used for comparative experiments at different temperatures and reaction time.

### 1.3 Characterization

XRD experiments were carried out with a Bruker D8 VENTURE diffractometer (Bruker, German) using Cu-K $\alpha$  radiation. SEM images were examined using a Hitachi S-4800 system. TEM images were obtained using FEI TECNAIG2F20-S-TWIN transmission electron microscope. TG-DSC measurements were measured with an SDT

Q600 instrument (heating rate ( $5^{\circ}\text{C min}^{-1}$ ), 200-1200 $^{\circ}\text{C}$ , under an air flow of 200 mL/min). XPS was carried out with a VG Scientific Model ESCALab220i-XL electron spectrometer using 300 W Al K $\alpha$  radiation. Using a HORIBA JOBIN YVON Fluorolog-3 spectrofluorometer system to collect two continuous 980 nm and 1550 nm laser diode. In order to analyze chemical components, FT-IR was used (Nicolet NEXUS 670).

#### 1.4 In vitro cytotoxicity evaluation

To evaluate the cytotoxicity of  $\text{BiF}_3:20\%\text{Yb}^{3+}/2\%\text{Er}^{3+}$  UCNPs, CCK-8 assays were used on B16-F10 cells incubated with UCNPs. B16-F10 cells were seeded in a 96-well plate at a density of 8000 cells per well and cultured in 5%  $\text{CO}_2$  at 37 $^{\circ}\text{C}$  for 24 h. The  $\text{BiF}_3:20\%\text{Yb}^{3+}/2\%\text{Er}^{3+}$  UCNPs (1 mg/mL) were dispersed in phospholipid aqueous solution (2 mg/mL) by ultrasound for 6 h (1:1).

#### 1.5 In vivo imaging

100  $\mu\text{L}$  of  $\text{BiF}_3:20\%\text{Yb}^{3+}/2\%\text{Er}^{3+}$  NPs phospholipid aqueous solution with concentration of 100  $\mu\text{g/mL}$  was injected intraperitoneally and subcutaneously into a Kunming mouse. In order to eliminate the interference of 980 nm excitation laser, a short-pass filter (700 nm) was used.

#### 1.6 In vivo X-Ray imaging

200  $\mu\text{L}$  of  $\text{BiF}_3:20\%\text{Yb}^{3+}/2\%\text{Er}^{3+}$  NPs phospholipid aqueous solution with concentration of 100  $\mu\text{g/mL}$  was subcutaneously injected into the mouse. Then, in vivo X-ray imaging was tested by a BRUKER In Vivo FXPRO imaging system. All animal procedures comply with the care and use regulations of animal institutions.

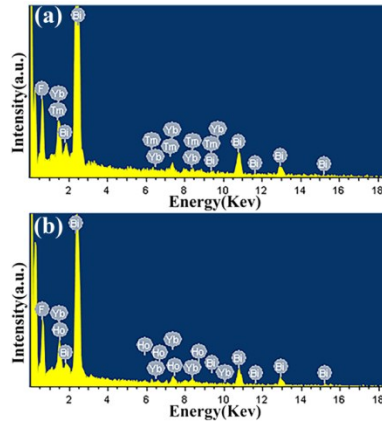

Figure S1 Energy-dispersive X-ray (EDX) spectroscopy: (a)  $\text{BiF}_3:20\%\text{Yb}^{3+}/0.5\%\text{Tm}^{3+}$ , (b)  $\text{BiF}_3:20\%\text{Yb}^{3+}/2\%\text{Ho}^{3+}$ .

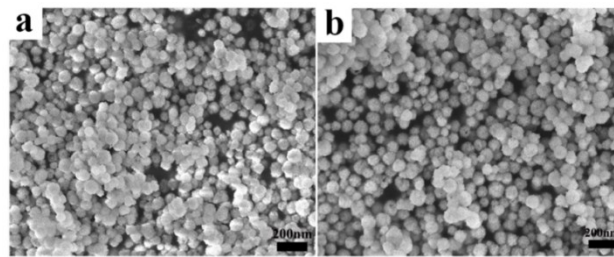

Figure S2 SEM images: (a)  $\text{BiF}_3:20\%\text{Yb}^{3+}/2\%\text{Ho}^{3+}$ , (b)  $\text{BiF}_3:20\%\text{Yb}^{3+}/0.5\%\text{Tm}^{3+}$ . (obtained in 1 min at room temperature)

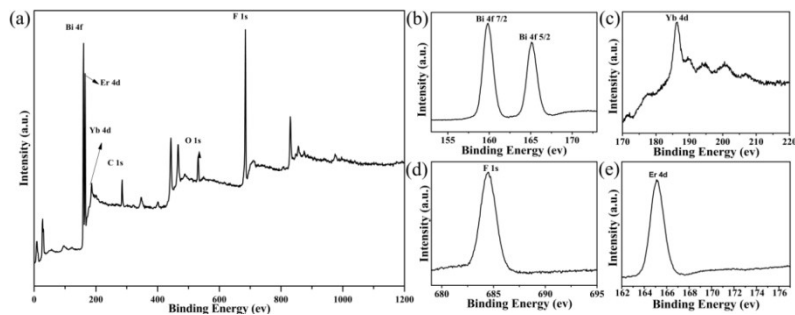

Figure S3 XPS survey spectra of  $\text{BiF}_3:20\%\text{Yb}^{3+}/2\%\text{Er}^{3+}$  NPs. (a) survey, (b) Bi 4f, (c) Yb 4d, (d) F 1s and (e) Er 4d.

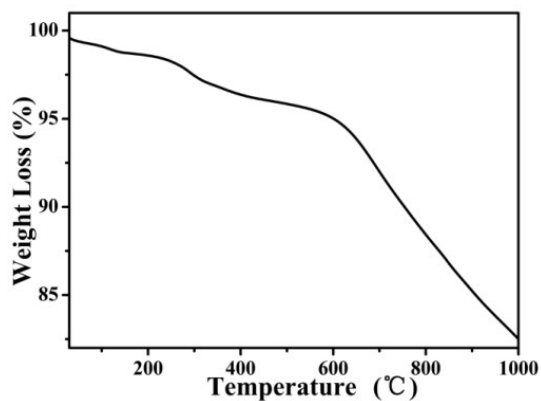

Figure S4 TG-DSC curve of the sample  $\text{BiF}_3:2\%\text{Er}^{3+}/20\%\text{Yb}^{3+}$ .

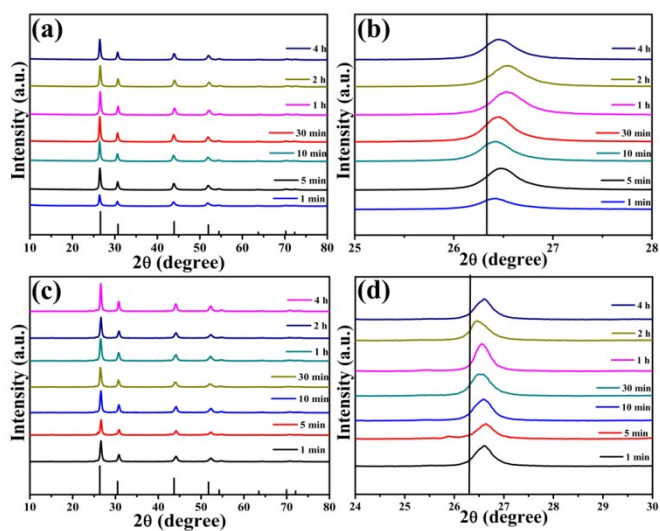

Figure S5 XRD patterns: (a-b)  $\text{BiF}_3: 20\%\text{Yb}^{3+}/2\%\text{Ho}^{3+}$ , (c-d)  $\text{BiF}_3: 20\%\text{Yb}^{3+}/0.5\%\text{Tm}^{3+}$  NPs obtained at different reaction time.

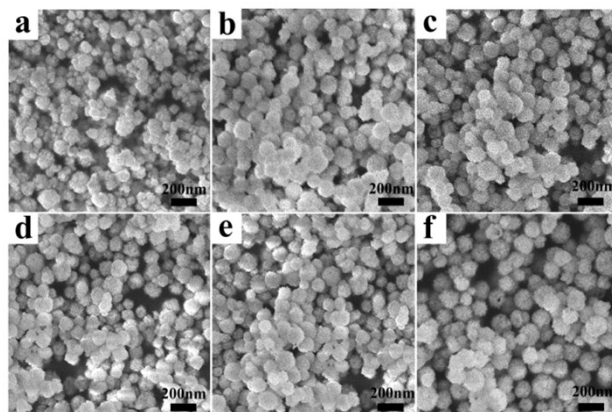

Figure S6 SEM images of  $\text{BiF}_3:20\% \text{Yb}^{3+}/2\% \text{Ho}^{3+}$  NPs obtained at different reaction time. (a) 5 min, (b) 10 min, (c) 30 min, (d) 1 h, (e) 2 h, and (f) 4 h.

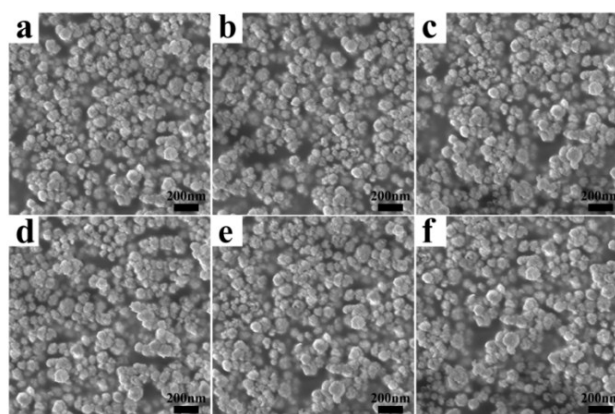

Figure S7 SEM images of  $\text{BiF}_3:20\% \text{Yb}^{3+}/0.5\% \text{Tm}^{3+}$  NPs obtained at different reaction time. (a) 5 min, (b) 10 min, (c) 30 min, (d) 1 h, (e) 2 h, and (f) 4 h.

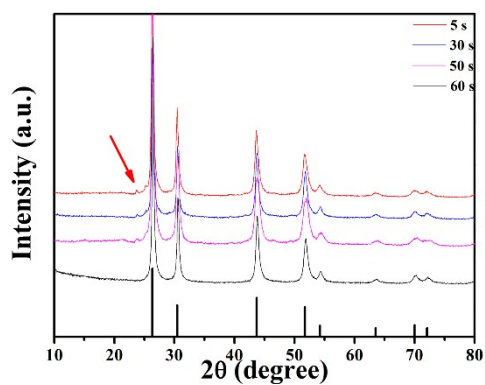

Figure S8 XRD patterns of the products obtained at different reaction time of  $\text{BiF}_3:20\% \text{Yb}^{3+}/2\% \text{Er}^{3+}$  nanoparticles.

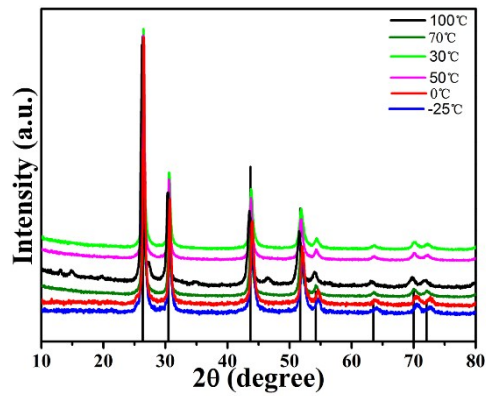

Figure S9 XRD patterns of BiF<sub>3</sub>: 20%Yb<sup>3+</sup>/2%Er<sup>3+</sup> NPs obtained at different temperatures (T = -25, 0, 30, 50, 70 and 100°C).

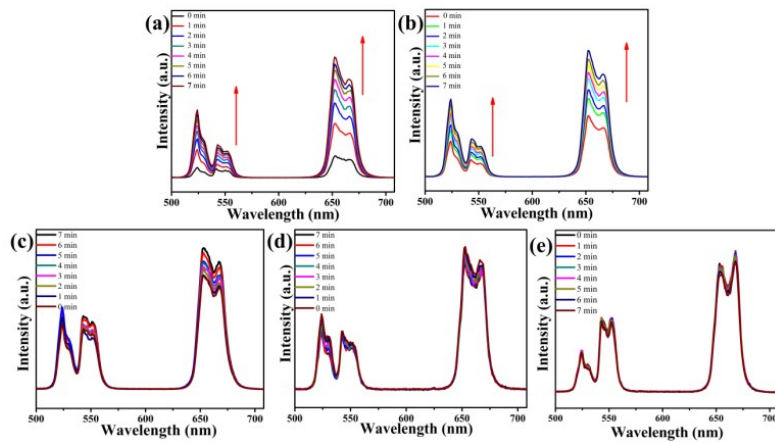

Figure S10 UCL spectra of BiF<sub>3</sub>: 20%Yb<sup>3+</sup>/2%Er<sup>3+</sup> nanoparticles under excitation of 980 nm with (a) uncalcined; (b) calcined at 50 °C; (c) calcined at 100 °C; (d) calcined at 200 °C and (e) calcined at 400 °C.

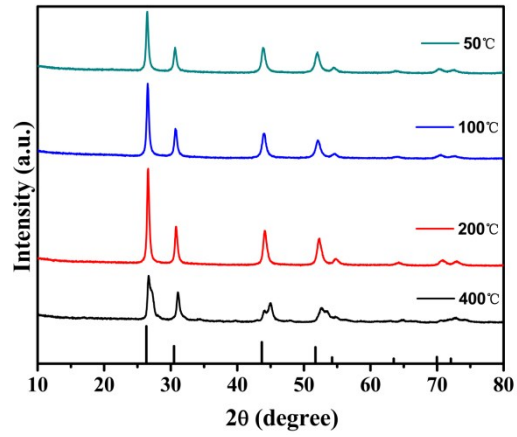

Figure S11 XRD patterns of BiF<sub>3</sub>: 20%Yb<sup>3+</sup>/2%Er<sup>3+</sup> with different calcination temperatures.

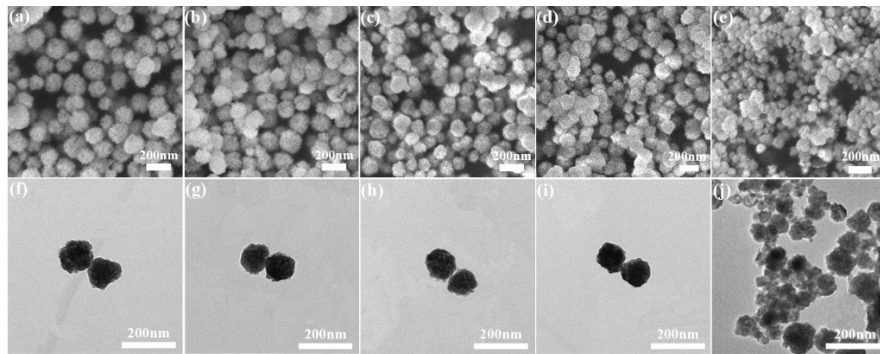

Figure S12 SEM and TEM images of BiF<sub>3</sub>:2%Er<sup>3+</sup>/20%Yb<sup>3+</sup> NPs obtained at different calcination temperatures. (a,f) uncalcined, (b,h) calcined at 50 °C, (c,i) calcined at 100 °C, (d,j) calcined at 200 °C, and (e,k) calcined at 400 °C.



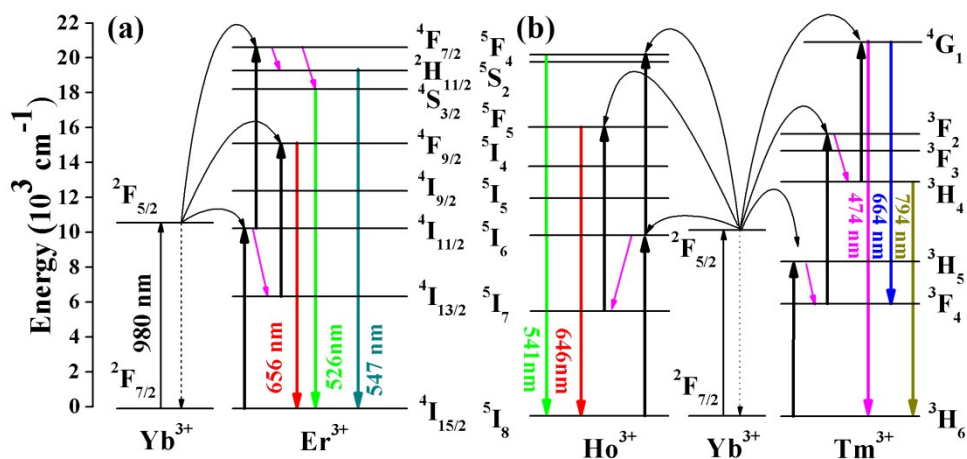

Figure S13 Energy level diagrams of  $\text{Yb}^{3+}$ ,  $\text{Er}^{3+}$ ,  $\text{Tm}^{3+}$  and  $\text{Ho}^{3+}$  ions and proposed UC mechanisms in  $\text{BiF}_3:\text{Ln}^{3+}$  NPs.

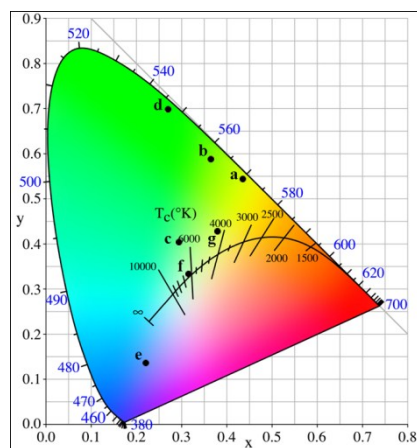

Figure S14 The CIE 1931 chromaticity diagram of  $\text{BiF}_3:\text{Ln}^{3+}$  NPs excited with a 980 nm laser.

Table S1 The summary of chemical composition, chromaticity coordinates (x, y) and emission color of the  $\text{BiF}_3:\text{Ln}^{3+}$  NPs.

| Sample                                                                                                      | Chromaticity Coordinates (x, y) | Emission color |
|-------------------------------------------------------------------------------------------------------------|---------------------------------|----------------|
| (a) BiF <sub>3</sub> :20%Yb <sup>3+</sup> /2%Er <sup>3+</sup>                                               | (0.4355,0.5438)                 | Yellow         |
| (b) BiF <sub>3</sub> : 20%Yb <sup>3+</sup> /1%Er <sup>3+</sup> /0.15%Ho <sup>3+</sup>                       | (0.3667,0.5897)                 | Yellow green   |
| (c)BiF <sub>3</sub> : 20%Yb <sup>3+</sup> /1%Er <sup>3+</sup> /0.5%Tm <sup>3+</sup>                         | (0.2947,0.4059)                 | Bluish white   |
| (d) BiF <sub>3</sub> : 20%Yb <sup>3+</sup> /2%Ho <sup>3+</sup>                                              | (0.269,0.6978)                  | Green          |
| (e) BiF <sub>3</sub> : 20%Yb <sup>3+</sup> /0.5%Tm <sup>3+</sup>                                            | (0.2225,0.1364)                 | Purplish blue  |
| (f) BiF <sub>3</sub> : 20%Yb <sup>3+</sup> /0.5%Tm <sup>3+</sup> /0.15%Ho <sup>3+</sup>                     | (0.3166,0.3327)                 | White          |
| (g) BiF <sub>3</sub> : 20%Yb <sup>3+</sup> /1%Er <sup>3+</sup> /0.5%Tm <sup>3+</sup> /0.15%Ho <sup>3+</sup> | (0.3783,0.4264)                 | pinkish        |
